# Supplementary material for: Noninvasive genotyping and monitoring of anaplastic lymphoma kinase (ALK) rearranged non-small cell lung cancer by capture-based next-generation sequencing
Source: PubMed Central journal article supplement (PMC5323149; doi:10.18632/oncotarget.11569), 2016-08-24
Supplement: oncotarget-07-65208-s001.pdf [file oncotarget-07-65208-s001.pdf]

## Noninvasive genotyping and monitoring of anaplastic lymphoma kinase (ALK) rearranged non-small cell lung cancer by capture-based next-generation sequencing

### Supplementary Materials

#### Supplementary Table S1: Summary of the next generation sequencing data.

See Supplementary\_Table\_S1

#### Supplementary Table S2: ALK fusions detected in 19 patients

| Patient ID | Gene | Baseline AF | EML4_break Point | ALK_break Point | EML4:exon | ALK:exon | HGVs format                            |
|------------|------|-------------|------------------|-----------------|-----------|----------|----------------------------------------|
| P01        | ALK  | 1.26%       | 42525721         | 29447302        | E13       | A20      | EML4:p.Met1_Lys496;ALK:p.Val1058_*1621 |
| P04        | ALK  | 0.05%       | 42482380         | 29446207        | E2        | A21      | EML4:p.Met1_Lys69;ALK:p.Gly1121_*1621  |
| P05        | ALK  | 0.59%       | 42504599         | 29447692        | E6        | A20      | EML4:p.Met1_Gln222;ALK:p.Val1058_*1621 |
| P06        | ALK  | 0.50%       | 42507968         | 29448100        | E6        | A20      | EML4:p.Met1_Gln222;ALK:p.Val1058_*1621 |
| P08        | ALK  | 10.09%      | 42525792         | 29446961        | E13       | A20      | EML4:p.Met1_Lys496;ALK:p.Val1058_*1621 |
| P09        | ALK  | 1.98%       | 42544475         | 29447478        | E18       | A20      | EML4:p.Met1_Ile685;ALK:p.Val1058_*1621 |
| P10        | ALK  | 6.85%       | 42499463         | 29447524        | E6        | A20      | EML4:p.Met1_Gln222;ALK:p.Val1058_*1621 |
| P11        | ALK  | 0.02%       | 42494395         | 29448171        | E6        | A20      | EML4:p.Met1_Gln222;ALK:p.Val1058_*1621 |
| P12        | ALK  | 19.47%      | 42524339         | 29446641        | E13       | A20      | EML4:p.Met1_Lys496;ALK:p.Val1058_*1621 |
| P13        | ALK  | 0.03%       | 42553276         | 29448240        | E20       | A20      | EML4:p.Met1_Tyr747;ALK:p.Leu1058_*1621 |
| P14        | ALK  | 0.09%       | 42552770         | 29446866        | E20       | A20      | EML4:p.Met1_Tyr747;ALK:p.Leu1058_*1621 |
| P15        | ALK  | 1.05%       | 42553182         | 29446472        | E20       | A20      | EML4:p.Met1_Tyr747;ALK:p.Leu1058_*1621 |
| P16        | ALK  | 8.01%       | 42505286         | 29447385        | E6        | A20      | EML4:p.Met1_Gln222;ALK:p.Val1058_*1621 |
| P17        | ALK  | 0.91%       | 42527554         | 29447695        | E13       | A20      | EML4:p.Met1_Lys496;ALK:p.Val1058_*1621 |
| P20        | ALK  | 6.04%       | 42526035         | 29446620        | E13       | A20      | EML4:p.Met1_Lys496;ALK:p.Val1058_*1621 |
| P21        | ALK  | 0.11%       | 42523040         | 29447778        | E13       | A20      | EML4:p.Met1_Lys496;ALK:p.Val1058_*1621 |
| P22        | ALK  | 0.16%       | 42498570         | 29446844        | E6        | A20      | EML4:p.Met1_Gln222;ALK:p.Val1058_*1621 |
| P23        | ALK  | 0.63%       | 42502563         | 29446697        | E6        | A20      | EML4:p.Met1_Gln222;ALK:p.Val1058_*1621 |
| P24        | ALK  | 3.34%       | 42526715         | 29447568        | E13       | A20      | EML4:p.Met1_Lys496;ALK:p.Val1058_*1621 |

**Supplementary Table S3: Putative somatic mutations detected in patients ctDNA**

| patient ID | Sample ID    | Gene   | mutation type               | Exon number | Amino acid change | Allele fraction | chr | pos       | Ref  | Alt | dbSNP_ID    | COSMIC_ID   |
|------------|--------------|--------|-----------------------------|-------------|-------------------|-----------------|-----|-----------|------|-----|-------------|-------------|
| P01        | RS1600890PLA | TP53   | missense_variant            | 8           | R273C             | 18.95%          | 17  | 7577121   | G    | A   | rs121913343 | COSM1645518 |
| P03        | RS1501596PLA | TRIM58 | missense_variant            | 6           | P398T             | 4.73%           | 1   | 248039522 | C    | A   | NA          | COSM355355  |
| P03        | RS1501596PLA | TP53   | missense_variant            | 6           | Y205H             | 4.27%           | 17  | 7578236   | A    | G   | NA          | COSM43642   |
| P03        | RS1501596PLA | TRPC5  | missense_variant            | 2           | Y59C              | 10.17%          | X   | 111195473 | T    | C   | NA          | NA          |
| P03        | RS1501596PLA | NOTCH1 | stop_gained                 | 27          | E1679*            | 7.56%           | 9   | 139397766 | C    | A   | NA          | COSM3724366 |
| P03        | RS1501596PLA | NAV3   | missense_variant            | 8           | Q590K             | 2.76%           | 12  | 78401086  | C    | A   | NA          | NA          |
| P04        | RS1603970PLA | ALK    | missense_variant            | 22          | L1152R            | 0.91%           | 2   | 29445270  | A    | C   | NA          | COSM97185   |
| P04        | RS1603970PLA | ALK    | missense_variant            | 23          | L1196M            | 0.34%           | 2   | 29443631  | G    | T   | NA          | COSM99137   |
| P04        | RS1603970PLA | ALK    | missense_variant            | 22          | I1171T            | 0.15%           | 2   | 29445213  | A    | G   | NA          | COSM4381100 |
| P08        | RS1501823PLA | SMAD4  | stop_gained                 | 11          | R445*             | 1.93%           | 18  | 48603032  | C    | T   | rs377767360 | COSM14096   |
| P10        | RS1500734PLA | TP53   | missense_variant            | 6           | S215T             | 2.50%           | 17  | 7578205   | C    | G   | NA          | COSM44175   |
| P12        | RS1500572PLA | TP53   | disruptive_inframe_deletion | 7           | IT255T            | 5.44%           | 17  | 7577514   | GTGA | G   | NA          | COSM1480063 |
| P16        | RS1501592PLA | TP53   | stop_gained                 | 8           | G266*             | 4.09%           | 17  | 7577142   | C    | A   | NA          | COSM44891   |
| P23        | RS1604133PLA | TP53   | missense_variant            | 6           | L194P             | 0.59%           | 17  | 7578268   | A    | G   | N           | COSM3675531 |
| P24        | RS1501547PLA | TP53   | missense_variant            | 7           | C238S             | 3.08%           | 17  | 7577569   | A    | T   | N           | COSM4340290 |

**Supplementary Table S4: Concentrations and Allelic Frequencies of ctDNA.**

See Supplementary\_Table\_S4

**Supplementary Table S5: Genomic regions targeted by the capture panel.**

See Supplementary\_Table\_S5
